# 1 High contiguity *de novo* genome sequence assembly 2 of Trifoliolate yam (*Dioscorea dumetorum*) using long 3 read sequencing

4  
5 Christian Siadjeu<sup>1,2\*</sup>, Boas Pucker<sup>2,3\*</sup>, Prisca Viehöver<sup>2</sup>, Dirk C. Albach<sup>1</sup> and Bernd Weisshaar<sup>2\*</sup>

6 <sup>1</sup> Institute for Biology and Environmental Sciences, Biodiversity and Evolution of Plants, Carl-von-Ossietzky  
7 University Oldenburg, Carl-von-Ossietzky Str. 9-11, 26111 Oldenburg, Germany; [christian.siadjeu@uol.de](mailto:christian.siadjeu@uol.de)  
8 (CS); [dirk.albach@uol.de](mailto:dirk.albach@uol.de) (DCA)

9 <sup>2</sup> Genetics and Genomics of Plants, Faculty of Biology, Center for Biotechnology (CeBiTec), Bielefeld  
10 University, Sequenz 1, 33615 Bielefeld, NRW, Germany; [bpucker@cebitec.uni-bielefeld.de](mailto:bpucker@cebitec.uni-bielefeld.de) (BP),  
11 [viehoeve@cebitec.uni-bielefeld.de](mailto:viehoeve@cebitec.uni-bielefeld.de) (PV), [bernd.weisshaar@uni-bielefeld.de](mailto:bernd.weisshaar@uni-bielefeld.de) (BW)

12 <sup>3</sup> Molecular Genetics and Physiology of Plants, Faculty of Biology and Biotechnology, Ruhr-University  
13 Bochum, Universitätsstraße 150, 44801 Bochum, Germany; [bpucker@cebitec.uni-bielefeld.de](mailto:bpucker@cebitec.uni-bielefeld.de) (BP)

14 \* Correspondence: [bernd.weisshaar@uni-bielefeld.de](mailto:bernd.weisshaar@uni-bielefeld.de); Tel.: +49-521-106-8720

15 + Shared first authorship. CS and BP contributed equally to this work and are co-first authors.

16 **Abstract:** The yam species *Dioscorea dumetorum* is one example of an orphan crop, not traded  
17 internationally. Post-harvest hardening starts within 24 hours after harvesting and renders the  
18 tubers inedible. Genomic resources are required for trifoliolate yam to improve breeding for  
19 non-hardening varieties and for other traits. Here, we describe the sequencing of the *D. dumetorum*  
20 genome and the generation of a *de novo* assembly together with a corresponding annotation. The  
21 two haplophases of this highly heterozygous genome are separated to a large extent. The assembly  
22 represents 485 Mbp of the genome with an N50 of over 3.2 Mbp. A total of 35,269 protein-encoding  
23 gene structures as well as 9,941 non-coding RNA genes were predicted and functional annotations  
24 were assigned.

25

26 **Keywords:** yam; *D. dumetorum*; nanopore sequencing; genome assembly; comparative genomics;  
27 read depth

28

---

## 29 1. Introduction

30 The yam species *Dioscorea dumetorum* (trifoliolate yam) belongs to the genus *Dioscorea* comprising  
31 about 600 described species. The genus is widely distributed throughout the tropics [1] and includes  
32 important root crops that offer staple food for over 300 million people. Eight *Dioscorea* species are  
33 commonly consumed in West and Central Africa, of which *D. dumetorum* has the highest nutrient  
34 value [2]. Yet, *D. dumetorum* constitutes an underutilized and neglected species despite its great  
35 potential for nutritional, agricultural, and pharmaceutical purposes. Tubers of *D. dumetorum* are  
36 protein-rich (9.6%) with a fairly balanced essential amino acids composition [3]. The provitamin A  
37 and carotenoids contents of the tubers of deep yellow genotypes are equivalent to those of yellow  
38 corn maize lines selected for increased concentrations of provitamin A [4]. The deep yellow yam  
39 tubers are used in antidiabetic treatments in Nigeria [5], probably due to the presence of  
40 dioscoretine, which is a bioactive compound with hypoglycaemic properties [6].

41 Unlike other yam species, the cultivation of *D. dumetorum* is limited by post-harvest hardening,  
42 which starts within 24 h after harvest and renders tubers inedible. Previous research showed that  
43 among 32 *D. dumetorum* cultivars tested, one cultivar was not affected by the hardening

High contiguity *de novo* genome sequence assembly of Trifoliolate yam (*Dioscorea dumetorum*) using long read sequencing  
2 of 10

44 phenomenon [7]. This discovery provides a starting point for a breeding program of *D. dumetorum*  
45 against the post-harvest hardening phenomenon. *Dioscorea* cultivars are obligate outcrossing plants  
46 that display highly heterozygous genomes. Thus, methods of genetic analysis routinely used in  
47 inbreeding species such as linkage analysis using the segregation progeny of an F2 generation and  
48 recombinant inbred lines are inapplicable to yam [8]. Furthermore, the development of  
49 marker-assisted selection requires the establishment of marker assays and dense genetic linkage  
50 maps. Thus, access to a complete and well-annotated genome sequence is one essential step towards  
51 the implementation of up-to-date genetic and genomic approaches for *D. dumetorum* breeding.  
52 Although the plastome sequences of 14 *Dioscorea* species [9] and the nuclear genome sequence of  
53 *Dioscorea rotundata* [8] have been published, there is still a need for data from additional,  
54 phylogenetically unrelated yam species. Here, we report sequencing and *de novo* assembly of the *D.*  
55 *dumetorum* Ibo sweet 3 genome sequence based on long reads.  
56

## 57 2. Materials and Methods

### 58 2.1. Sampling and Sequencing

59 A diploid *D. dumetorum* accession Ibo sweet 3 that does not display post-harvest hardening was  
60 collected in the South-West region of Cameroon in 2013 [7]. Tubers of this accession were transferred  
61 to Oldenburg (Germany) and the corresponding plants were cultivated in a greenhouse at 25°C. The  
62 haploid genome size of the Ibo sweet 3 genotype had been estimated to be 322 Mbp through flow  
63 cytometry [10].

64 DNA was extracted from 1g of leaf tissue using a CTAB-based method modified from [11].  
65 After grinding the sample in liquid nitrogen, the powder was suspended in 5mL CTAB1 buffer  
66 supplemented with 300µL β-mercaptoethanol. The suspension was incubated at 75°C for 30 minutes  
67 and inverted every five minutes. Next, 5mL dichloromethane were added and the solutions were  
68 mixed by inverting. The sample was centrifuged at 11,200 g at 20°C for 30 minutes. The clear  
69 supernatant was mixed with 10mL CTAB2 in a new reaction tube by inverting. Next, a  
70 centrifugation was performed at 11,200 g at 20°C for 30 minutes. After discarding the supernatant,  
71 1mL NaCl (1M) was added to re-suspend the sediment by gently flicking the tube. By adding an  
72 equivalent amount of 1mL isopropanol and careful mixing, the DNA was precipitated again and the  
73 sample was centrifuged as described above. After washing the sediment with 1mL of 70% ethanol,  
74 200µL CTAB-TE buffer containing 2 mg RNaseA were added. Re-suspension and RNA degradation  
75 were achieved by incubation over night at room temperature. DNA quality and quantity were  
76 assessed via NanoDrop2000 measurement, agarose gel electrophoresis, and Qubit measurement.  
77 The SRE kit (Circulomics) was used to enrich long DNA fragments following the suppliers'  
78 instructions. Results were validated via Qubit measurement.

79 Library preparation was performed with 1µg of high molecular weight DNA following the  
80 SQK-LSK109 protocol (Oxford Nanopore Technologies, ONT). Sequencing was performed on four  
81 R9.4.1 flow cells on a GridION. Flow cells were treated with nuclease flush (20µL DNaseI (NEB) and  
82 380µL nuclease flush buffer), once the number of active pores dropped below 200, to allow  
83 successive sequencing of multiple libraries on an individual flow cell. Live base calling was  
84 performed on the GridION by Guppy (ONT).

85 The Illumina paired-end (PE) library preparation was performed according to the Illumina  
86 TruSeq DNA Sample Preparation v2 Guide. High molecular weight DNA was fragmented by  
87 nebulization. End pair and A-tailing adaptors were ligated to the fragmented DNA. A two percent  
88 low melt agarose gel was used to size select adaptor-ligated fragments. The fragments harbouring  
89 adaptors on the both ends were enriched by PCR and final libraries were evaluated using PicoGreen.  
90 Average fragment size of the libraries was estimated on a Bio Analyzer High Sensitivity DNA chip.  
91 The PE library with an insert size of 700 to 790 bp was sequenced with 2 x 250 nt mode on an  
92 Illumina HiSeq-1500.  
93

High contiguity *de novo* genome sequence assembly of Trifoliolate yam (*Dioscorea dumetorum*) using long read sequencing  
3 of 10

## 94 2.2. Genome assembly and polishing

95 Canu v1.8 [12] was deployed for the genome assembly with the following parameters  
96 "'genomeSize = 350m', 'corOutCoverage = 200' 'correctedErrorRate = 0.12' batOptions = -dg 3 -db 3  
97 -dr 1 -ca 500 -cp 50' 'minReadLength = 10000' 'minOverlapLength = 5000' 'corMhapFilterThreshold =  
98 0.0000000002' 'ovlMerThreshold = 500' 'corMhapOptions = --threshold 0.85 -num-hashes 512  
99 -num-min-matches 3 -ordered-sketch-size 1000 -ordered-kmer-size 14 -min-olap-length 5000  
100 -repeat-idf-scale 50'". The value for the genome size, estimated to be 322 Mbp, was increased to 350  
101 Mbp to increase the number of reads utilized for the assembly process.

102 ONT reads were mapped back to the assembled sequence with minimap2 v2.17 [13], using the  
103 settings recommended for ONT reads. Next, the contigs were polished by racon v.1.4.7 [14] with -m  
104 8 -x -6 -g -8 as recommended prior to the polishing step with medaka. Two runs of medaka v.0.10.0  
105 (<https://github.com/nanoporetech/medaka>) polishing were performed with default parameters (-m  
106 r941\_min\_high) using ONT reads. Illumina short reads were aligned to the medaka consensus  
107 sequence using BWA-MEM v. 0.7.17 [15]. This alignment was subjected to Pilon v1.23 [16] for final  
108 polishing in three iterative rounds.

109 Downstream processing was based on a previously described workflow [17] and performed by  
110 customized Python scripts for purging of short contigs (<100kb) and calculation of assembly  
111 statistics (<https://github.com/bpucker/yam>). Contigs with less than 3-fold average coverage in an  
112 Illumina short read mapping were compared against nt via BLASTn with an e-value cut-off at  $10^{-10}$  to  
113 identify and remove bacterial and fungal sequences.  
114

## 115 2.3. Genome sequence annotation

116 Hints for gene prediction were generated by aligning *D. rotundata* transcript sequences (TDr96  
117 v1.0 [8] as previously described [18]. BUSCO v3 [19] was applied to generate a species-specific  
118 parameter set. For comparison, the *D. rotundata* genome assembly GCA\_002260605.1 [8] was  
119 retrieved from NCBI. Hints and parameters were subjected to AUGUSTUS v3.3 [20] for gene  
120 prediction with previously described parameters [18]. Various approaches involving parameter files  
121 of rice and maize as well as running the gene prediction on a sequence with masked repeats were  
122 evaluated. BUSCO was applied again to assess the completeness of the gene prediction. The best  
123 results for *D. dumetorum* genome sequence annotation were obtained based on an unmasked  
124 assembly sequence with yam specific parameters generated via BUSCO as previously described  
125 [19,21]. Predicted genes were filtered based on sequence similarity to entries in several databases  
126 (UniProt/SwissProt, Araport11, *Brachypodium distachyon* v3.0, *Elaeis guineensis* v5.1,  
127 GCF\_000005425.2, GCF\_000413155.1, *Musa acuminata* Pahang v2). Predicted peptide sequences were  
128 compared to these databases via BLASTp [22] using an e-value cut-off of  $10^{-5}$ . Scores of resulting  
129 BLASTp hits were normalized to the score when searched against the set of predicted peptides. Only  
130 predicted sequences with at least 0.25 score ratio and 0.25 query length covered by the best  
131 alignment were kept. Functional annotation was assigned via InterProScan5 [23] and through  
132 sequence similarity to well characterized sequences. Representative transcript and peptide  
133 sequences were identified per gene based on previously defined criteria to encode the longest  
134 possible peptide [24, Pucker, 2017 #5337].

135 Prediction of non-protein coding RNA genes like tRNA and rRNA genes was performed based  
136 on tRNAscan-SE v2.0.3 [25,26] and INFERNAL (cmscan) v1.1.2 [27] based on the Rfam13 [28].

137

## 138 2.4. Assembly and annotation assessment

139 The percentage of phased and merged regions in the genome was assessed with the focus on  
140 predicted genes. Based on Illumina and ONT read mappings, the average coverage depth per gene  
141 was calculated. The distribution of these average values per gene allowed the classification of genes

High contiguity *de novo* genome sequence assembly of Trifoliolate yam (*Dioscorea dumetorum*) using long read sequencing  
4 of 10

142 as phased (haploid read depth) or merged (diploid read depth). As previous studies revealed that  
143 Illumina short reads have a higher resolution for such coverage analysis [29], we focused on the  
144 Illumina read data set for these analyses. Sequence variants were detected based on this read  
145 mapping as previously described [30]. The number of heterozygous variants per gene was  
146 calculated and compared between the groups of putatively phased and merged genes. Predicted  
147 peptide sequences were compared against the annotation of other species including *A. thaliana* and  
148 *D. rotundata* via OrthoFinder v2 [31].

149 Sequence reads and assembled sequences are available at ENA under the project ID ERP118030  
150 (see File S1 for details). The assembly described in this manuscript is available under  
151 GCA\_902712375. Additional annotation files are available from  
152 <https://docs.cebitec.uni-bielefeld.de/s/ArHmB4J2MXMsA5S>.

153 Alleles covered by the fraction of phase separated gene structures were matched based on  
154 reciprocal best BLAST hits of the coding sequences following a previously described approach [17].  
155 Alleles were considered a valid pair that represents a single gene if the second best match displayed  
156 99% or less of the score of the best match. A customized Python script for this allele assignment is  
157 available on github (<https://github.com/bpucker/yam>).  
158  
159

### 160 3. Results

161 In total, we generated 70 Gbp of ONT reads data representing respectively about 218x coverage  
162 of the estimated 322 haploid genome. Additionally, 13 Gbp of Illumina short read data (about 40x  
163 coverage) were generated. After all polishing steps, the final assembly represents 485 Mbp of the  
164 highly heterozygous *D. dumetorum* genome with an N50 of 3.2 Mbp (Table 1). Substantial  
165 improvement of the initial assembly through various polishing steps is indicated by the increasing  
166 number of recovered BUSCOs (File S2). The final assembly displayed more BUSCOs (92.30% out of  
167 1440 included in the embryophyta data set) compared to the publicly available genome sequence  
168 assembly of *D. rotundata* (v0.1) for that we detected 81.70% BUSCOs with identical parameters.  
169

170 **Table 1.** Statistics of selected versions of the *D. dumetorum* genome assembly (see File S3 for a full table).  
171

|                                 | Initial<br>assembly | Racon1      | Medaka2     | Pilon3      | Final       |
|---------------------------------|---------------------|-------------|-------------|-------------|-------------|
| Number of contigs               | 1,172               | 1,172       | 1,215       | 1,215       | 924         |
| Max. contig length [bp]         | 20,187,448          | 20,424,333  | 17,910,017  | 17,878,854  | 17,878,854  |
| Assembly size [bp]              | 501,985,705         | 508,061,170 | 507,215,754 | 506,184,192 | 485,115,345 |
| Assembly size without N<br>[bp] | 501,985,705         | 508,061,170 | 507,215,754 | 506,184,192 | 485,115,345 |
| GC content                      | 37.74%              | 37.66%      | 37.87%      | 37.59%      | 37.57%      |
| N50 [bp]                        | 3,896,882           | 3,930,287   | 2,598,889   | 2,593,751   | 3,190,870   |
| N90 [bp]                        | 136,614             | 138,199     | 137,206     | 136,754     | 156,407     |
| BUSCO (complete)                | 85.70%              | 89.80%      | 91.90%      | 92.30%      | 92.30%      |

172

173 Different gene prediction approaches were evaluated (File S4) leading to a final set of 35,269  
174 protein-encoding gene structures. The average gene spans 4.3 kbp, comprises 6 exons and encodes  
175 455 amino acids (see File S4 for details). The gene prediction dataset for *D. dumetorum* is further  
176 supported by the identification of 6,475 single copy orthologs between *D. dumetorum* and *D.*  
177 *rotundata* as well as additional orthogroups (File S5). If the phase separated allelic gene structures

High contiguity *de novo* genome sequence assembly of Trifoliolate yam (*Dioscorea dumetorum*) using long read sequencing  
5 of 10

178 were considered (Figure 1), 3,352 additional single copy orthologs were detected. Functional  
179 annotation was assigned to 23,835 genes (File S6). Additionally, 9,941 non-coding RNA genes were  
180 predicted including 784 putative tRNA genes  
181 (<https://docs.cebitec.uni-bielefeld.de/s/ArHmB4J2MXMsA5S>).

182

183

184

185

186

187

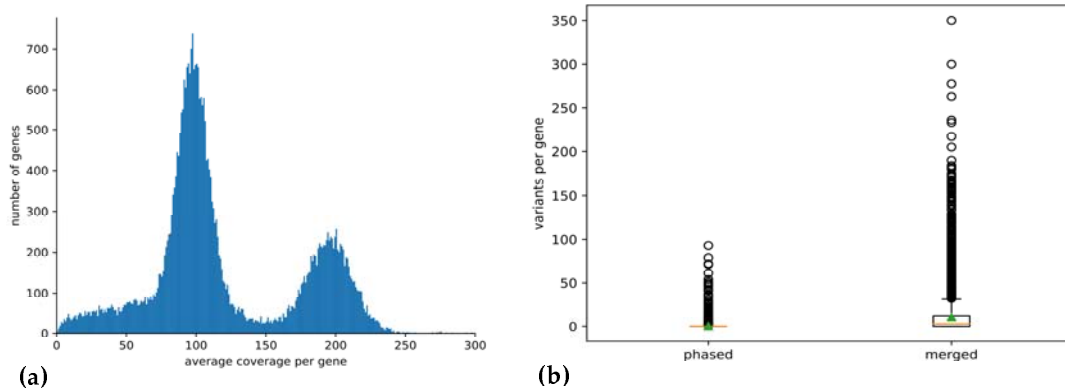

188 **Figure 1.** (a) Distribution of the average sequencing read depth per gene structure. Predicted gene structures  
189 were classified into phase separated and merged based on the average read depth value deduced from the  
190 analysis presented here. The haploid read depth with Illumina short reads ranges from 50-fold to 150-fold. (b)  
191 Number of heterozygous sequence variants in phase separated and merged genes. The high proportion of  
192 heterozygous variants in merged genes is due to the mapping of reads originating from two different alleles to  
193 the same region of the assembly.

194

195

196 Average read mapping depth per gene was analyzed to distinguish genes annotated in  
197 separated and merged haplophases, respectively (Figure 1, File S7). About 64% of all predicted  
198 protein-encoding gene structures were in the expected range of the haploid read mapping depth  
199 between 50-fold and 150-fold and about 27% are merged with a read depth between 150-fold and  
200 250-fold. Only 6% of all genes show an average read depth below 50-fold and only 1% show an  
201 average coverage higher than 250-fold. It should be noted that the gene structures annotated in the  
202 phase separated part will cover in general two alleles per gene. A total of 22,885 gene structures,  
203 representing the 64% in the range of the haploid read mapping depth, were sorted into allelic pairs  
204 which was successful for 8,492 genes.

205

206

#### 207 4. Discussion

208 The release of genome sequences of many model and crop plants has provided new  
209 opportunities for gene identification and studies of genome evolution, both ultimately serving the  
210 process of plant breeding [32] by allowing discovery of genes responsible for important agronomic  
211 traits and the development of molecular markers associated with these traits. Here, we present the  
212 first genome sequence for *Dioscorea dumetorum*, an important crop for Central and Western Africa,  
213 and the second for the genus. Our assembly offers a great opportunity to understand the evolution  
214 of yam and to elucidate some biological constraints inherent to yam including a long growth cycle,  
215 poor to non-flowering, polyploidy, vegetative propagation, and a heterozygous genetic background  
216 [33]. Yam improvement has been challenging due to these factors preventing the genetic study of  
217 important traits in yam [34].

High contiguity *de novo* genome sequence assembly of Trifoliolate yam (*Dioscorea dumetorum*) using long read sequencing  
6 of 10

218 Oxford Nanopore sequencing has proven to be a reliable and affordable technology for  
219 sequencing genomes thus replacing Illumina technique for *de novo* genome sequencing due to  
220 substantially higher assembly continuity [29,35]. Large fractions of the genome sequence were  
221 separated into phases, while regions with lower heterozygosity are merged into one representative  
222 sequence. Coverage analysis with Illumina read mapping allowed to classify predicted gene  
223 structures as 'phased' or 'merged' based on an average coverage around 100 fold or around 200 fold,  
224 respectively. While this distinction is possible at the gene structure level, whole contigs cannot be  
225 classified this way. Several million bp long contigs comprise alternating phase separated and  
226 merged regions. Therefore, it is likely that the contigs represent a mixture of both haplophases with  
227 the risk of switching between phases at each merged region. Since the haplophases cannot be  
228 resolved continuously through low heterozygosity regions, purging of contigs to reduce the  
229 assembly into a representation of the haploid genome might be advantageous for some applications  
230 in the future. The bimodal coverage distribution (Figure 1a) supports the assumption that *D.*  
231 *dumetorum* Ibo sweet 3 has a diploid genome. A higher ploidy would result in more distinct coverage  
232 peaks as observed for a genome with up to pentaploid parts [29]. The N50 of 3.2 Mbp is in the  
233 expected range for a long read assembly of a highly heterozygous species as others reported similar  
234 values before [36]. Due to regions of merged haplophases the total assembly size of 485 Mbp is  
235 smaller than expected for a fully phase separated "diploid" genome sequence based on the haploid  
236 genome size estimation of 322 Mbp.

237 Interestingly, we noticed an increase of the number of BUSCOs through several polishing  
238 rounds. Initial assemblies of long reads can contain numerous short insertions and deletions as these  
239 are the major error type [37]. The identification of open reading frames is hindered through apparent  
240 disruptions of open reading frames. Through the applied polishing steps, the number of such  
241 apparent frame shifts is reduced thus leading to an increase of detected BUSCOs.

242 *Dioscorea dumetorum* has 36 chromosomes [38], so with 924 contigs we are far from  
243 chromosome-level resolution but considerably better than the other genome assembly published in  
244 the genus, that of *D. rotundata* with 40 chromosomes [8]. Knuth [39], circumscribed *D. dumetorum*  
245 and *D. rotundata* in two sections *Lasiophyton* and *Enantiophyllum* respectively. Also, phylogenetically  
246 the two species are quite distantly related [9]. Comparing our predicted peptides to the *D. rotundata*  
247 peptide set [8], we identified about 9,800 single copy orthologs (6,475 in the whole set of 35,269 gene  
248 structures plus 3,352 with a relation of one gene in *D. rotundata* and two phase separated alleles in *D.*  
249 *dumetorum*) which could elucidate the evolutionary history of those species. Our genome sequence is  
250 structurally accurate and more protein-encoding genes were predicted. The number of predicted  
251 protein-encoding gene structures was determined to be 35,269, but this number includes two times  
252 about 11,300 genes (see Figure 1) represented by two alleles. The CDS-based pairing we performed  
253 detected about 8,500 of the theoretical maximum of 11.300 cases which is a good success rate given  
254 the fact that close paralogs and also hemizygous genome regions contribute to the detected number  
255 of phase separated gene structures. If phase separated gene structures (alleles) are excluded, a  
256 number of about 24,000 genes would result for *D. dumetorum*. This fits to the range detected in other  
257 higher plant genomes [40, Pucker, 2019 #5484]. The BUSCO results support this interpretation with  
258 about 40% of BUSCOs that occur with exactly two copies. Therefore, the true number of  
259 protein-encoding genes of a haploid yam genome could be around 25.000, also considering that the  
260 BUSCO analysis indicated that still a small fraction of the genome sequence is missing. This gene  
261 number fits well to gene numbers of higher plants based on all available annotations at the NCBI  
262 [41] and is larger than that of *Theobroma cacao*, *Jatropha curcas*, *Oryza brachyantha*, and *Ananas comosus*.  
263 The average length of genes and the number of encoded amino acids are in the same range as  
264 previously observed for other plant species from diverse taxonomic groups [21,42].

265 Our draft genome has the potential to provide a complete new way to breed in *D. dumetorum*,  
266 for example avoiding the post-harvest hardening phenomenon, which begins within 24 h after  
267 harvest and makes it necessary to process the tubers within this time to allow consumption [2]. The  
268 family Dioscoreaceae consists of more than 800 species [43] and the post-harvest hardening  
269 phenomenon has only been reported from *D. dumetorum* [44], outlining the singularity of this species  
270 among yam species. We predicted a large number of genes, which will include putative genes

High contiguity *de novo* genome sequence assembly of Trifoliolate yam (*Dioscorea dumetorum*) using long read sequencing  
7 of 10

271 controlling the post-harvest hardening on *D. dumetorum* and many useful bioactive compounds  
272 detected in this yam species, which is considered the most nutritious and valuable from a  
273 phytomedical point of view [45]. Ongoing work will try to identify these genes and polymorphisms  
274 for making them available for subsequent breeding.

275 In summary, we present the first *de novo* nuclear genome sequence assembly of *D. dumetorum*  
276 with very good contiguity and partially separated phases. Our assembly has no ambiguous bases  
277 with a well applicable protein-encoding gene annotation. This assembly unraveled the genomic  
278 structure of *D. dumetorum* to a large extent and will serve as a reference genome sequence for yam  
279 breeding by helping to identify and develop molecular markers associated with relevant agronomic  
280 traits, and to understand the evolutionary history of *D. dumetorum* and yam species in general.  
281

282 **Supplementary Materials:** The following are available online:

283 File S1: Sequencing overview with ENA identifiers of runs.

284 File S2: Results of BUSCO analysis of different assembly versions.

285 File S3: General statistics of different assembly versions.

286 File S4: Comparison of different gene prediction approaches.

287 File S5: Orthogroups of predicted peptides of *D. rotundata* and *D. dumetorum*.

288 File S6: Functional annotation of predicted genes in the *D. dumetorum* genome sequence.

289 File S7: Average short read mapping coverage of predicted genes in the *D. dumetorum* genome sequence.  
290

291 **Author Contributions:** CS, BP, DCA, and BW designed the study. CS collected the sample. BP performed DNA  
292 extraction, ONT sequencing, and genome assembly. PV performed Illumina sequencing. CS and BP processed  
293 the assembly. BP performed gene prediction and evaluation. CS and BP wrote the initial draft. BW and DCA  
294 revised the manuscript. All authors read and approved the final version of the manuscript.

295 **Funding:** This research was partly funded by the German Academic Exchange Service (DAAD, No. 57299294)  
296 with a fellowship to CS.

297 **Acknowledgments:** We thank the Appropriate Development for Africa foundation (ADAF) for the yam  
298 collection in Cameroon and for permission to study the plants in Germany in the framework of our mutual  
299 protocol agreement. We also thank the German Society of Botany (DBG) for supporting the research stay of CS  
300 in Bielefeld. We acknowledge support for the Article Processing Charge by the Deutsche  
301 Forschungsgemeinschaft and the Open Access Publication Fund of Bielefeld University.

302

303 **Conflicts of Interest:** The authors declare no conflict of interest.

304

## 305 References

- 306 1. Viruel, J.; Forest, F.; Paun, O.; Chase, M.W.; Devey, D.; Couto, R.S.; Segarra-Moragues, J.G.;  
307 Catalan, P.; Wilkin, P. A nuclear Xdh phylogenetic analysis of yams (*Dioscorea*  
308 *Dioscoreaceae*) congruent with plastid trees reveals a new Neotropical lineage. *Botanical*  
309 *Journal of the Linnean Society* **2018**, 1-15.
- 310 2. Sefa-Dedeh, S.; E.O., A. Biochemical and textural changes in trifoliolate yam *Dioscorea*  
311 *dumetorum* tubers after harvest. *Food Chemistry* **2002**, 79, 27-40.
- 312 3. Alozie, Y.E.; Akpanabiatu, M.; Eyong, E.U.; Umoh, I.B.; Alozie, G. Amino Acid Composition  
313 of *Dioscorea dumetorum* Varieties. *Pakistan Journal of Nutrition* **2009**, 8, 103-105.
- 314 4. Ferede, R.; Maziya-Dixon, B.; Alamu, O.E.; Asiedu, R. Identification and quantification of  
315 major carotenoids of deep yellow-fleshed yam (tropical *Dioscorea dumetorum*). *Journal of*  
316 *Food, Agruculture & Environment* **2010**, 8, 160-166.

High contiguity *de novo* genome sequence assembly of Trifoliolate yam (*Dioscorea dumetorum*) using long read sequencing  
8 of 10

- 317 5. Nimenibo-Uadia, R.; Oriakhi, A. Proximate, Mineral and Phytochemical Composition of  
318 *Dioscorea dumetorum* Pax. *J. Appl. Sci. Environ. Manage.* **2017**, *21*, 771-774.
- 319 6. Iwu, M.M.; Okunji, C.O.; Ohiaeri, G.O.; Akah, P.; Corley, D.; Tempesta, M.S. Hypoglycaemic  
320 activity of dioscoretine from tubers of *Dioscorea dumetorum* in normal and alloxan diabetic  
321 rabbits. *Planta Medica* **1990**, *56*, 264-267.
- 322 7. Siadjeu, C.; Panyoo, E.A.; Toukam, G.M.S.; Bell, J.M.; Nono, B.; Medoua, G.N. Influence of  
323 Cultivar on the Postharvest Hardening of Trifoliolate Yam (*Dioscorea dumetorum*) Tubers.  
324 *Hindawi* **2016**, *16*.
- 325 8. Tamiru, M.; Natsume, S.; Takagi, H.; White, B.; Yaegashi, H.; Shimizu, M.; Yoshida, K.;  
326 Uemura, A.; Oikawa, K.; Abe, A., et al. Genome sequencing of the staple food crop white  
327 Guinea yam enables the development of a molecular marker for sex determination. *BMC*  
328 *Biology* **2017**, *15*, 86.
- 329 9. Magwe-Tindo, J.; Wieringa, J.J.; Sonke, B.; Zapfack, L.; Vigouroux, Y.; Couvreur, T.L.P.;  
330 Scarcelli, N. Complete plastome sequence of 14 African yam species (*Dioscorea* spp.).  
331 *Mitochondrial DNA Part B* **2019**.
- 332 10. Siadjeu, C.; Mayland-Quellhorst, E.; Albach, D.C. Genetic diversity and population structure  
333 of trifoliolate yam (*Dioscorea dumetorum* Kunth) in Cameroon revealed by  
334 genotyping-by-sequencing (GBS). *BMC Plant Biology* **2018**, *18*, 359.
- 335 11. Rosso, M.G.; Li, Y.; Strizhov, N.; Reiss, B.; Dekker, K.; Weisshaar, B. An *Arabidopsis thaliana*  
336 T-DNA mutagenised population (GABI-Kat) for flanking sequence tag based reverse  
337 genetics. *Plant Molecular Biology* **2003**, *53*, 247-259.
- 338 12. Koren, S.; Walenz, B.P.; Berlin, K.; Miller, J.R.; Bergman, N.H.; Phillippy, A.M. Canu:  
339 scalable and accurate long-read assembly via adaptive k-mer weighting and repeat  
340 separation. *Genome Research* **2017**, *27*, 722-736.
- 341 13. Li, H. Minimap2: pairwise alignment for nucleotide sequences. *Bioinformatics* **2018**, *34*,  
342 3094-3100.
- 343 14. Vaser, R.; Sović, I.; Nagarajan, N.; Šikić, M. Fast and accurate *de novo* genome assembly  
344 from long uncorrected reads. *Genome Research* **2017**, *27*, 737-746.
- 345 15. Li, H. Aligning sequence reads, clone sequences and assembly contigs with BWA-MEM.  
346 *arXiv* **2013**, 1303.3997v1302 (Preprint posted May 1326, 2013).
- 347 16. Walker, B.J.; Abeel, T.; Shea, T.; Priest, M.; Abouelliel, A.; Sakthikumar, S.; Cuomo, C.A.;  
348 Zeng, Q.; Wortman, J.; Young, S.K., et al. Pilon: an integrated tool for comprehensive  
349 microbial variant detection and genome assembly improvement. *PLoS ONE* **2014**, *9*, e112963.
- 350 17. Pucker, B.; Holtgräwe, D.; Rosleff Sörensen, T.; Stracke, R.; Viehöver, P.; Weisshaar, B. A De  
351 Novo Genome Sequence Assembly of the *Arabidopsis thaliana* Accession Niederzenz-1  
352 Displays Presence/Absence Variation and Strong Synteny. *PLoS ONE* **2016**, *11*, e0164321.
- 353 18. Pucker, B.; Holtgräwe, D.; Weisshaar, B. Consideration of non-canonical splice sites  
354 improves gene prediction on the *Arabidopsis thaliana* Niederzenz-1 genome sequence. *BMC*  
355 *Research Notes* **2017**, *10*, 667.
- 356 19. Simão, F.A.; Waterhouse, R.M.; Ioannidis, P.; Kriventseva, E.V.; Zdobnov, E.M. BUSCO:  
357 assessing genome assembly and annotation completeness with single-copy orthologs.  
358 *Bioinformatics* **2015**, *31*, 3210-3212.



High contiguity *de novo* genome sequence assembly of Trifoliolate yam (*Dioscorea dumetorum*) using long read sequencing  
9 of 10

- 359 20. Keller, O.; Kollmar, M.; Stanke, M.; Waack, S. A novel hybrid gene prediction method  
360 employing protein multiple sequence alignments. *Bioinformatics* **2011**, *27*, 757-763.
- 361 21. Pucker, B.; Feng, T.; Brockington, S. Next generation sequencing to investigate genomic  
362 diversity in Caryophyllales. *bioRxiv* **2019**, , doi:10.1101/646133 (Preprint posted 2019-07-27).
- 363 22. Altschul, S.F.; Gish, W.; Miller, W.; Myers, E.W.; Lipman, D.J. Basic local alignment search  
364 tool. *Journal of Molecular Biology* **1990**, *215*, 403-410.
- 365 23. Jones, P.; Binns, D.; Chang, H.Y.; Fraser, M.; Li, W.; McAnulla, C.; McWilliam, H.; Maslen, J.;  
366 Mitchell, A.; Nuka, G., et al. InterProScan 5: genome-scale protein function classification.  
367 *Bioinformatics* **2014**, *30*, 1236-1240, doi:10.1093/bioinformatics/btu031.
- 368 24. Cheng, C.Y.; Krishnakumar, V.; Chan, A.; Thibaud-Nissen, F.; Schobel, S.; Town, C.D.  
369 Araport11: a complete reannotation of the Arabidopsis thaliana reference genome. *The Plant*  
370 *Journal* **2017**, 789-804.
- 371 25. Lowe, T.M.; Eddy, S.R. tRNAscan-SE: a program for improved detection of transfer RNA  
372 genes in genomic sequence. *Nucleic Acids Research* **1997**, *25*, 955-964.
- 373 26. Chan, P.P.; Lowe, T.M. tRNAscan-SE: Searching for tRNA genes in genomic sequences. In  
374 *Gene Prediction: Methods and Protocols*, 2019/04/26 ed.; Kollmar, M., Ed. Springer New York:  
375 New York, 2019; Vol. 1962, pp. 1-14.
- 376 27. Nawrocki, E.P.; Eddy, S.R. Infernal 1.1: 100-fold faster RNA homology searches.  
377 *Bioinformatics* **2013**, *29*, 2933-2935.
- 378 28. Kalvari, I.; Argasinska, J.; Quinones-Olvera, N.; Nawrocki, E.P.; Rivas, E.; Eddy, S.R.;  
379 Bateman, A.; Finn, R.D.; Petrov, A.I. Rfam 13.0: shifting to a genome-centric resource for  
380 non-coding RNA families. *Nucleic Acids Research* **2018**, *46*, D335-D342.
- 381 29. Pucker, B.; Ruckert, C.; Stracke, R.; Viehover, P.; Kalinowski, J.; Weisshaar, B. Twenty-Five  
382 Years of Propagation in Suspension Cell Culture Results in Substantial Alterations of the  
383 Arabidopsis Thaliana Genome. *Genes* **2019**, *10*, 671, doi:10.3390/genes10090671.
- 384 30. Baasner, J.S.; Howard, D.; Pucker, B. Influence of neighboring small sequence variants on  
385 functional impact prediction. *bioRxiv* **2019**, , doi:10.1101/596718 (Preprint posted 2019-06-13).
- 386 31. Emms, D.M.; Kelly, S. OrthoFinder: phylogenetic orthology inference for comparative  
387 genomics. *Genome Biology* **2019**, *20*, 238, doi:10.1186/s13059-019-1832-y.
- 388 32. Ruggieri, V.; Alexiou, K.G.; Morata, J.; Argyris, J.; Pujol, M.; Yano, R.; Nonaka, S.; Ezura, H.;  
389 Latrasse, D.; Boualem, A., et al. An improved assembly and annotation of the melon  
390 (*Cucumis melo* L.) reference genome. *Scientific Reports* **2018**, *8*, 8088,  
391 doi:10.1038/s41598-018-26416-2.
- 392 33. Mignouna, H.D.; Abang, M.M.; Asiedu, R. Harnessing modern biotechnology for tropical  
393 tuber crop improvement: Yam (*Dioscorea* spp.) molecular breeding. *African Journal of*  
394 *Biotechnology* **2003**, *2*, 12.
- 395 34. Mignouna, H.D.; Abang, M.M.; Asiedu, R. Genomics of Yams, a Common Source of Food  
396 and Medicine in the Tropics. In *Genomics of Tropical Crop Plants*, Moore, P.H., Ming, R., Eds.  
397 2008; 10.1007/978-0-387-71219-2\_23pp. 549-570.
- 398 35. Michael, T.P.; Jupe, F.; Bemm, F.; Motley, S.T.; Sandoval, J.P.; Lanz, C.; Loudet, O.; Weigel,  
399 D.; Ecker, J.R. High contiguity Arabidopsis thaliana genome assembly with a single  
400 nanopore flow cell. *Nature Communications* **2018**, *9*, 541.

High contiguity *de novo* genome sequence assembly of Trifoliolate yam (*Dioscorea dumetorum*) using long read sequencing  
10 of 10

- 401 36. Paajanen, P.; Kettleborough, G.; Lopez-Girona, E.; Giolai, M.; Heavens, D.; Baker, D.; Lister,  
402 A.; Cugliandolo, F.; Wilde, G.; Hein, I., et al. A critical comparison of technologies for a plant  
403 genome sequencing project. *Gigascience* **2019**, *8*, doi:10.1093/gigascience/giy163.
- 404 37. Salmela, L.; Walve, R.; Rivals, E.; Ukkonen, E. Accurate self-correction of errors in long reads  
405 using de Bruijn graphs. *Bioinformatics* **2017**, *33*, 799-806, doi:10.1093/bioinformatics/btw321.
- 406 38. Miege, J. Nombres chromosomiques et répartition géographique de quelques plantes  
407 tropicales et équatoriales. *Revue de Cytologie et de Biologie Végétales* **1954**, *15*, 312-348.
- 408 39. Knuth, R. Dioscoreaceae. In *Das Pflanzenreich*, Engelm, A., Ed. Engelmann, W.: Leipzig, 1924.
- 409 40. Wendel, J.F.; Jackson, S.A.; Meyers, B.C.; Wing, R.A. Evolution of plant genome architecture.  
410 *Genome Biology* **2016**, *17*, 37, doi:10.1186/s13059-016-0908-1.
- 411 41. Pucker, B.; Brockington, S.F. Genome-wide analyses supported by RNA-Seq reveal  
412 non-canonical splice sites in plant genomes. *BMC Genomics* **2018**, *19*, 980.
- 413 42. Pucker, B.; Holtgräwe, D.; Stadermann, K.B.; Frey, K.; Huettel, B.; Reinhardt, R.; Weisshaar,  
414 B. A chromosome-level sequence assembly reveals the structure of the *Arabidopsis thaliana*  
415 Nd-1 genome and its gene set. *PLoS One* **2019**, *14*, e0216233.
- 416 43. Barton, H. Yams: Origins and Development. **2014**.
- 417 44. Treche, S.; Delpeuch, F. Physiologie Vegetale - Mise en evidence de l'apparition d'un  
418 epaississement membranaire dans le parenchyme des tubercules de *Dioscorea dumetorum*  
419 au cours de la conservation. *C. R. Acad. Sc. Paris* **1979**, *288*.
- 420 45. Price, E.J.; Wilkin, P.; Sarasan, V.; Fraser, P.D. Metabolite profiling of *Dioscorea* (yam)  
421 species reveals underutilised biodiversity and renewable sources for high-value  
422 compounds. *Scientific Reports* **2016**, *6*.

423
